# Supplementary material for: Rodent ultrasonic vocal interaction resolved with millimeter precision using hybrid beamforming
Source: eLife journal article supplement (doi:10.7554/elife.86126), 2023-07-26
Supplement: supp [file elife-86126-supp-v1.zip]

Archive with 9 entries (9 files):
- elife_poa_e86126_Video_1.mp4
- elife_poa_e86126_Figure_1_figure_supplement_1.pdf
- elife_poa_e86126_Figure_3_figure_supplement_1.pdf
- elife_poa_e86126_Figure_3_figure_supplement_2.pdf
- elife_poa_e86126_Figure_3_figure_supplement_3.pdf
- elife_poa_e86126_Figure_4_figure_supplement_1.pdf
- elife_poa_e86126_Figure_5_figure_supplement_1.pdf
- elife_poa_e86126_Response_to_Review_Comments/Decision.mp4
- elife_poa_e86126_Response_to_Review_Comments/Decision.mp4
