# Supplementary material for: Rodent ultrasonic vocal interaction resolved with millimeter precision using hybrid beamforming
Source: eLife journal article supplement (doi:10.7554/elife.86126), 2023-07-26
Supplement: supp [file elife-86126-supp-v1.zip › elife_poa_e86126_Figure_3_figure_supplement_1.pdf]

A

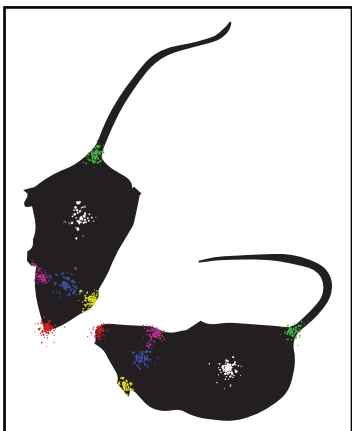

Estimate Clouds

B

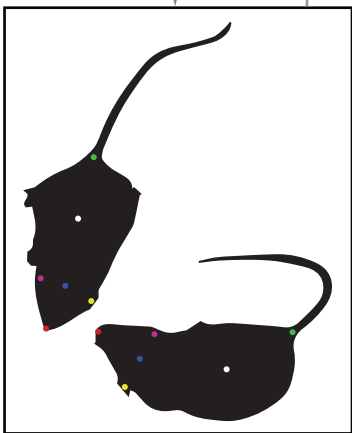

Cluster Centroids

C

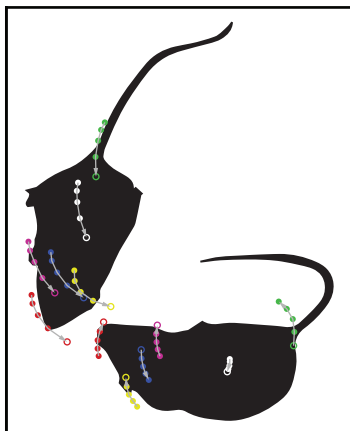

Temporal Analysis

D

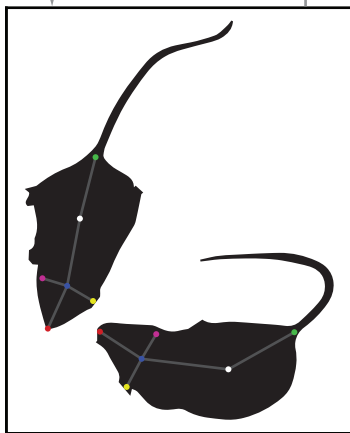

Spatial Analysis

E

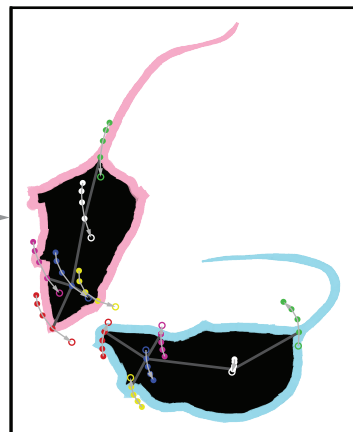

Identified Mice
