# Supplementary figures and images for: Rodent ultrasonic vocal interaction resolved with millimeter precision using hybrid beamforming
Source: eLife journal article supplement (doi:10.7554/elife.86126), 2023-07-26

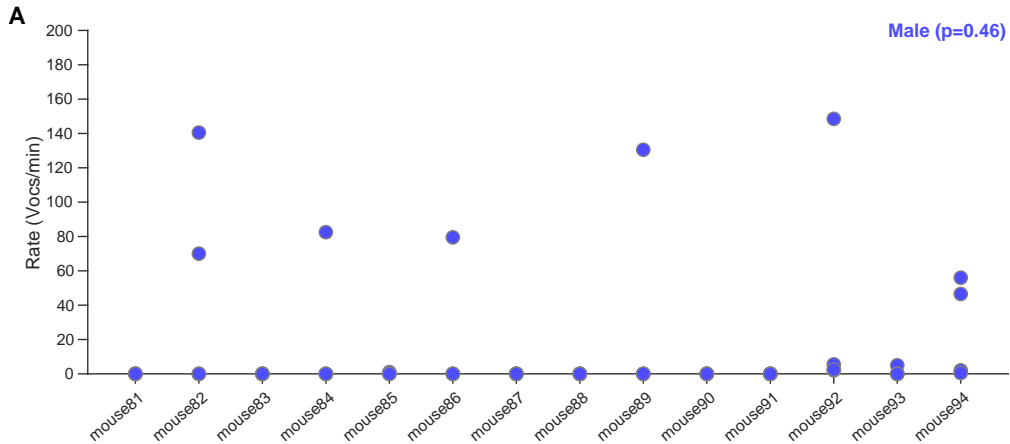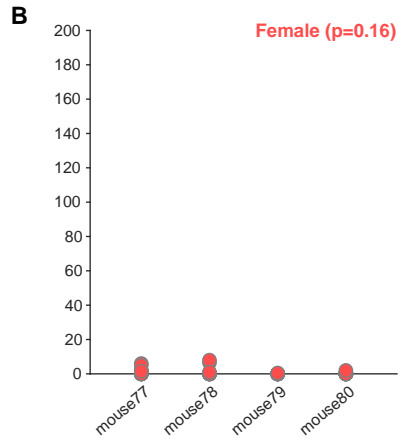

Supplement: supp [file elife-86126-supp-v1.zip]

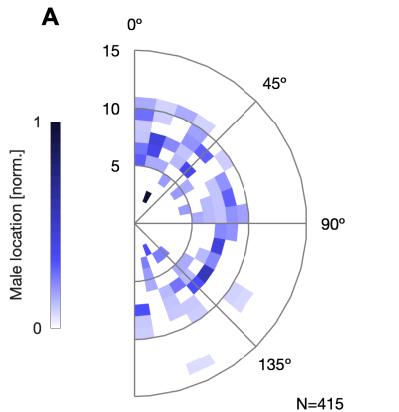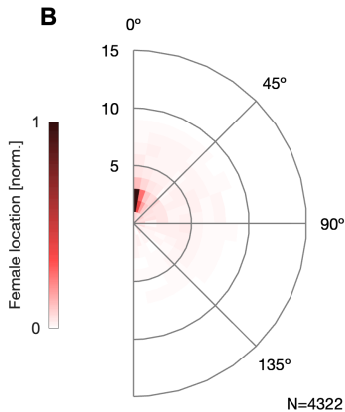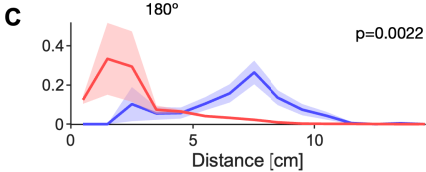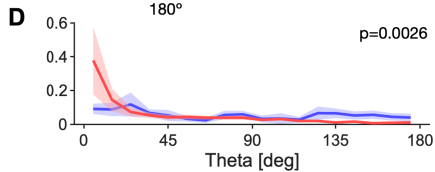

Supplement: supp [file elife-86126-supp-v1.zip]

**A****USM4**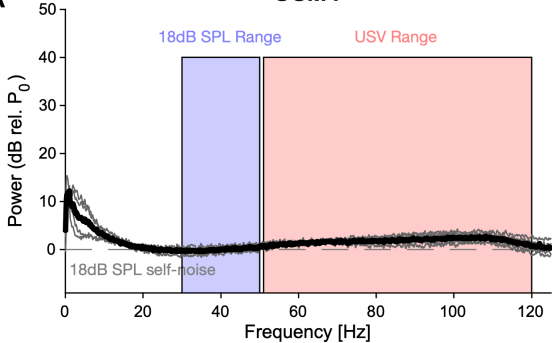**B****Cam64**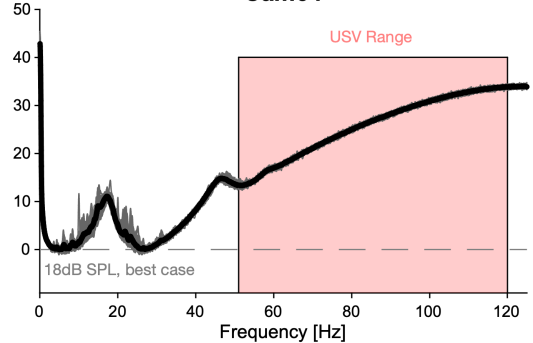

Supplement: supp [file elife-86126-supp-v1.zip › elife_poa_e86126_Figure_1_figure_supplement_1.pdf]

**A**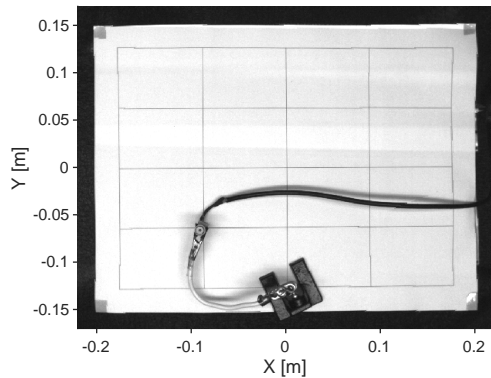**B**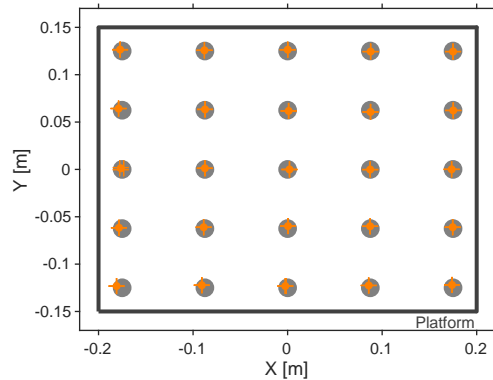**C**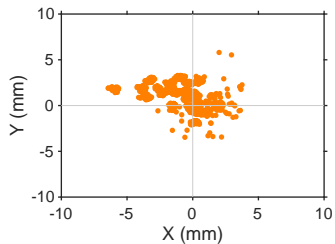**D**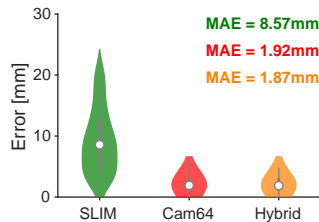**E**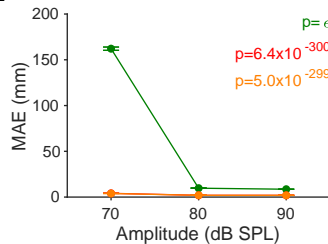

Supplement: supp [file elife-86126-supp-v1.zip › elife_poa_e86126_Figure_3_figure_supplement_2.pdf]

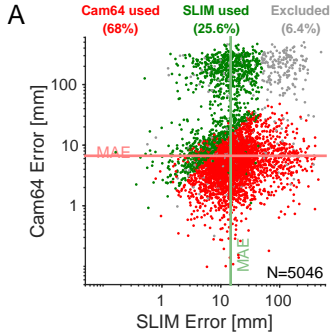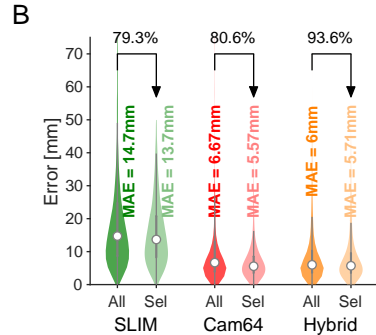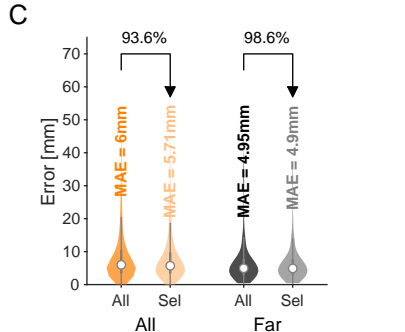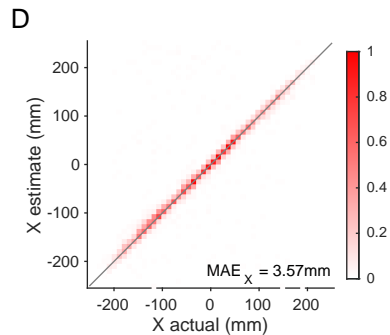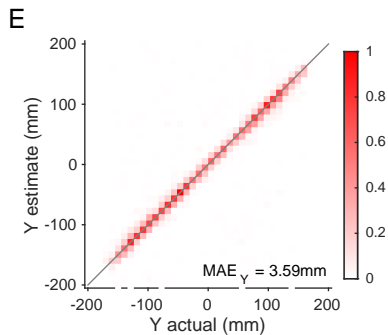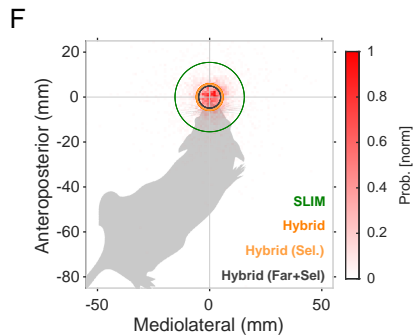

Supplement: supp [file elife-86126-supp-v1.zip › elife_poa_e86126_Figure_3_figure_supplement_3.pdf]
